# Supplementary material
Source: publisher figshare collection journal article supplement (https://tandf.figshare.com/ndownloader/files/14420876)
Supplement: Supplementary file 1 [file 14420876]

Supplementary Information: Molecular dynamics study of bimetallic Fe-Cu Janus nanoparticles formation by electrical explosion of wires

A.A. Tsukanov, A.S. Lozhkomoev, M.I. Lerner, I. Gotman*,*

E.Y. Gutmanas and S.G. Psakhie


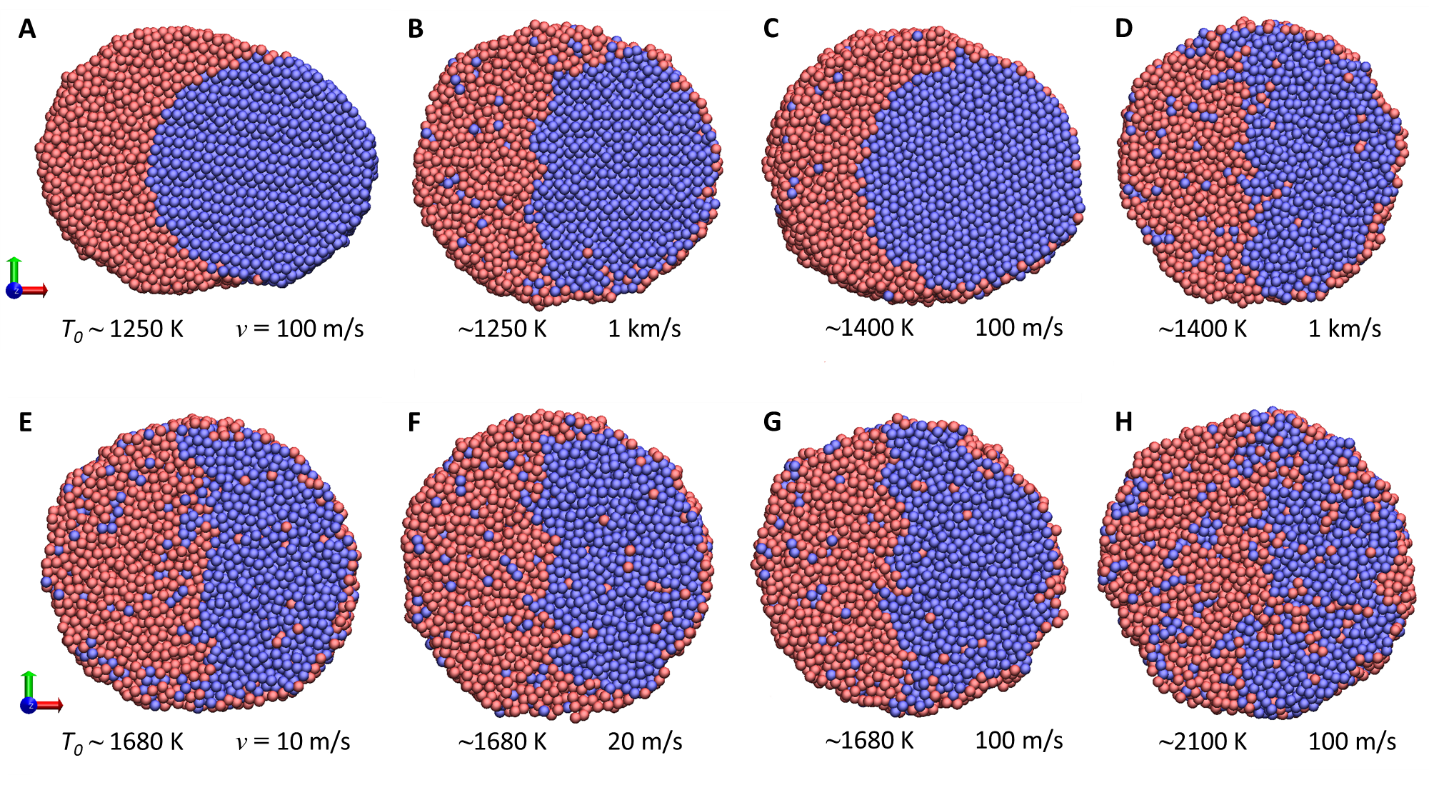


Figure S1. Cross-sectional views of bimetallic nanoparticles formed by collision of 60 Å-diameter Fe and Cu IMNPs at different initial temperature *T0* and velocity *v.* Adiabatic MD simulation. Fe - blue, Cu - red.


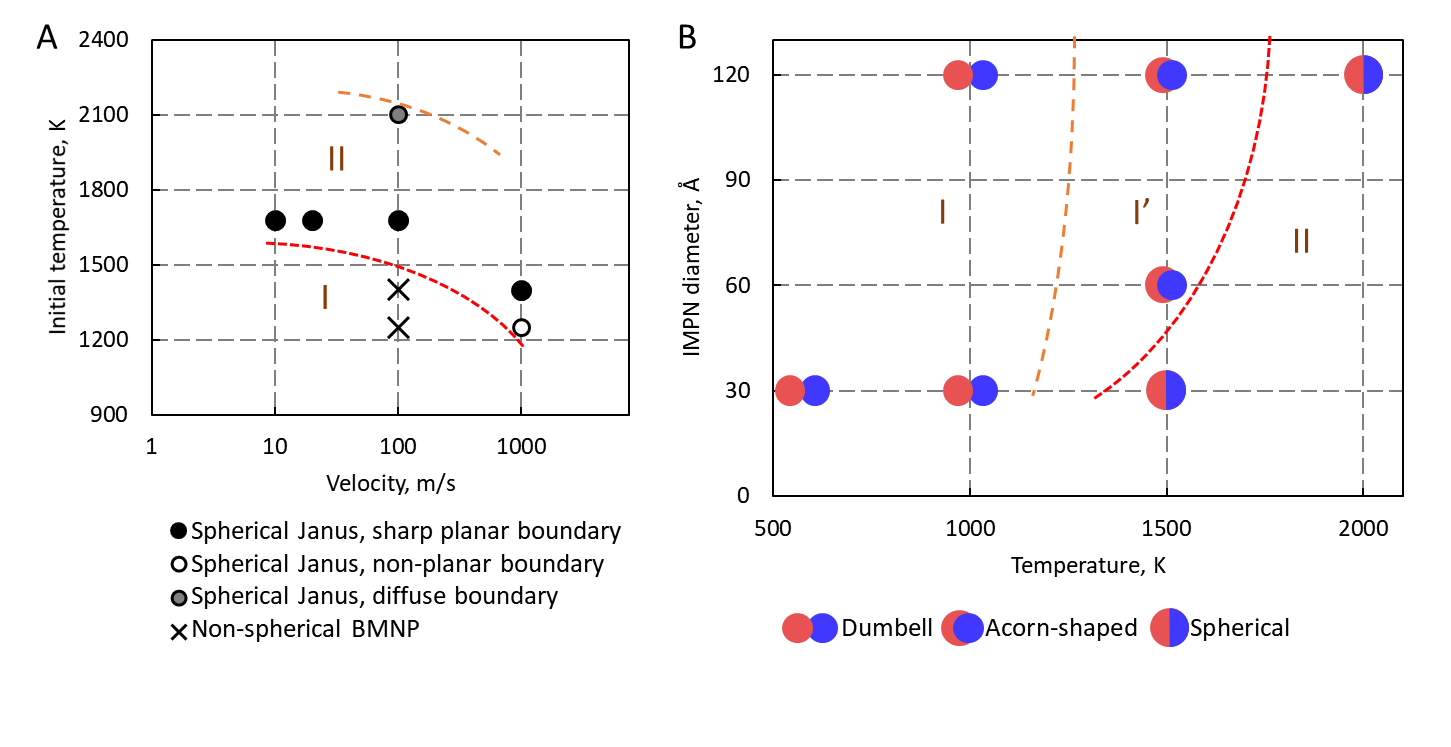


Figure S2. Temperature-velocity (A) and IMNP diameter-temperature (B) diagrams illustrating regions of conditions under which bimetallic Fe-Cu particles with different configurations are formed. **A** - adiabatic MD simulation of collision of 60Å-diameter IMNPs: region **I** - non-spherical BMNPs; region **II** - spherical Janus BMNPs; red dashed line – roughly the expected critical temperature *T** as a function of collision velocity. **B** - cv-SMD simulation of collision of same-size IMNPs: regions **I** and **I’** - non-spherical BMNPs; region **II** - spherical Janus BMNPs; red dashed line - roughly the expected critical temperature *T** as a function of IMNP diameter.


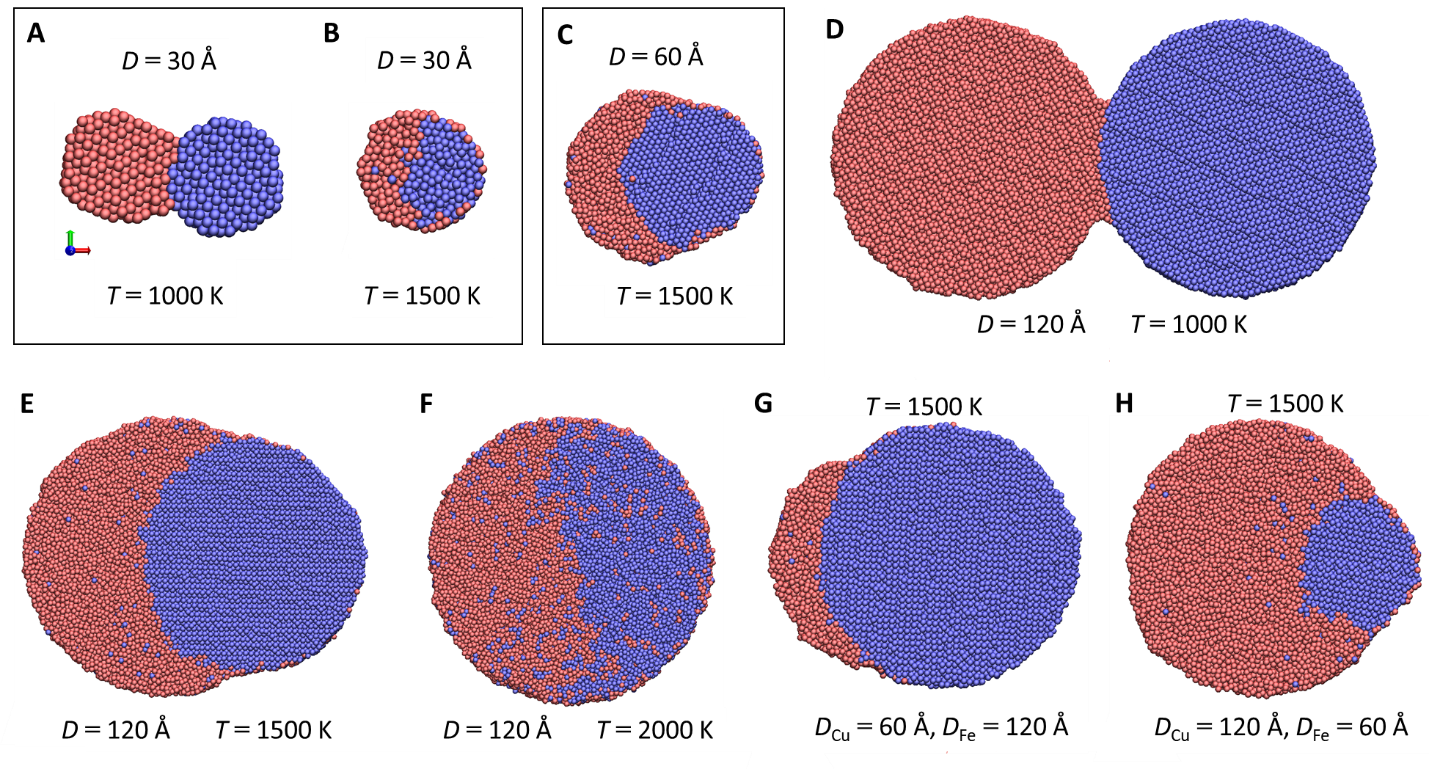


Figure S3. Cross-sectional views of bimetallic nanoparticles formed by the merging of Fe and Cu IMNPs with different diameters at different temperature *T*. Steered MD simulation. Fe - blue, Cu - red.

Figure S4. Final configuration and free energy of merging of Fe and Cu IMNPs with diameter *D* = 30 Å at temperatures below the melting points of both components (cv-SMD with *vc* = 1 m/s). Cu nanoparticle (orange metallic and red) shows soft-matter-like behaviour.

Figure S5.Soft-matter-like behaviour of copper nanoparticle(*D* = 30 Å, orange metallic) at 550 K (significantly below the melting point of bulk Cu). The motion of the labelled group of surface atoms (red arrow) demonstrates the higher mobility (self-diffusivity) of Cu.

Figure S6. Results of cv-SMD (NVT, *T* = 1500 K) simulations with increased pulling velocity *vc* = 5 m/s. Equilibrium structures are similar to the corresponding structures obtained with *vc* = 1 m/s (Figure 5A,B and Figure 4B). A detailed comparison can be found in Table 2.
